# Supplementary material for: Short Lives: The Impact of Parental Death on Early-Life Mortality and Height in the Netherlands, 1850–1940
Source: Oxford University Press journal article supplement (doi:10.1215/00703370-10421550), 2023-01-19
Supplement: quanjer_esm.pdf [file quanjer_esm.pdf]

# **Short Lives: The Impact of Parental Death on Early-Life Mortality and Height in the Netherlands, 1850–1940**

Björn Quanjer, Ingrid K. van Dijk, and Matthias Rosenbaum-Feldbrügge\*

\*All authors contributed equally to this article

## *Supplementary material*

Table S1: Summary statistics split for non-orphaned and orphaned boys

Table S2: Effect of parental death in period in childhood on boys' likelihood of death, Cox proportional hazard survival analysis, birth cohort 1850-1879

Table S3: Effect of parental death in period in childhood on boys' likelihood of death, Cox proportional hazard survival analysis, birth cohort 1880-1899

Table S4: Effect of parental death in period in childhood on boys' likelihood of death, Cox proportional hazard survival analysis, birth cohort 1900-1922

Table S5: Effect of parental death in period in childhood on girls' likelihood of death, Cox proportional hazard survival analysis, birth cohort 1850-1879

Table S6: Effect of parental death in period in childhood on girls' likelihood of death, Cox proportional hazard survival analysis, birth cohort 1880-1899

Table S7: Effect of parental death in period in childhood on girls' likelihood of death, Cox proportional hazard survival analysis, birth cohort 1900-1922

Table S8: Effect of paternal and maternal death and birth order on boys' likelihood of death, interaction models, Cox proportional hazard survival analysis

Table S9: Effect of parental death in childhood on height outcomes of boys in centimeters, by birth cohort, OLS regression model

Table S10: Effect of parental death in period in childhood on height outcomes of boys in centimeters, by birth cohort, by age, OLS regression model

Table S1. Summary statistics split for non-orphaned and orphaned boys

|                                          | <i>Mortality sample</i> |              | <i>Height sample</i> |              |
|------------------------------------------|-------------------------|--------------|----------------------|--------------|
|                                          | Boys, Non-orphan        | Boys, Orphan | Boys, Non-orphan     | Boys, Orphan |
| Percentage or mean                       |                         |              |                      |              |
| Stature at draft in cm (sd)              | -                       | -            | 169.0 (7.1)          | 168.3 (7.3)  |
| <b>Control variables</b>                 |                         |              |                      |              |
| <b><i>Birth order (sd)</i></b>           | 3.3 (2.2)               | 4.0 (2.5)    | 3.1 (2.1)            | 3.8 (2.4)    |
| <b><i>Socioeconomic status in %</i></b>  |                         |              |                      |              |
| Unskilled workers                        | 34.8 (5,343)            | 35.7 (1,241) | 34.2 (1,039)         | 35.4 (398)   |
| Elite                                    | 2.3 (347)               | 2.3 (79)     | 1.6 (48)             | 2.0 (22)     |
| Middle Class                             | 14.7 (2,265)            | 14.9 (520)   | 14.4 (437)           | 13.9 (156)   |
| Skilled Workers                          | 31.2 (4,767)            | 28.7 (1,000) | 31.5 (959)           | 29.9 (336)   |
| Farmers                                  | 12.9 (1,976)            | 15.6 (542)   | 15.2 (463)           | 16.4 (185)   |
| No/unknown                               | 4.3 (666)               | 2.8 (99)     | 3.1 (95)             | 3.1 (28)     |
| <b><i>Province in %</i></b>              |                         |              |                      |              |
| Friesland, Groningen, Noord Holland (NW) | 30.2 (4,639)            | 32.9 (1,146) | 47.9 (1,456)         | 47.5 (534)   |
| Drenthe, Overijssel, Gelderland (E)      | 17.2 (2,638)            | 18.7 (650)   | 15.9 (485)           | 15.9 (179)   |
| Utrecht, Zuid Holland, Zeeland (SW)      | 36.6 (5,622)            | 32.9 (1,145) | 19.0 (579)           | 19.0 (214)   |
| Noord-Brabant, Limburg (S)               | 16.0 (2,465)            | 15.5 (540)   | 17.1 (521)           | 17.5 (197)   |
| <b><i>Study Birth Cohort</i></b>         |                         |              |                      |              |
| Birth cohort 1850-1879                   | 31.5 (4,837)            | 36.4 (1,270) | 41.8 (1,272)         | 50.8 (571)   |
| Birth cohort 1880-1899                   | 36.1 (5,546)            | 37.2 (1,296) | 40.4 (1,229)         | 37.9 (426)   |
| Birth cohort 1900-1922                   | 32.4 (4,981)            | 26.3 (915)   | 17.8 (540)           | 11.4 (128)   |
| <b>N</b>                                 | 15,364                  | 3,481        | 2,940                | 1,226        |

Table S2. Effect of parental death in period in childhood on boys' likelihood of death, Cox proportional hazard survival analysis, birth cohort 1850-1879

|                        | Model 1: Age 0 to 20 |           |      | Model 2: Age 0 to 20,<br>controlled |           |      | Model 3: Age 0 to 1 |           |      | Model 4: Age 1 to 5 |           |      | Model 5: Age 5 to 12 |           |      | Model 6: Age 12 to 20 |           |      |
|------------------------|----------------------|-----------|------|-------------------------------------|-----------|------|---------------------|-----------|------|---------------------|-----------|------|----------------------|-----------|------|-----------------------|-----------|------|
|                        | HR                   | 95% CI    | p    | HR                                  | 95% CI    | p    | HR                  | 95% CI    | p    | HR                  | 95% CI    | p    | HR                   | 95% CI    | p    | HR                    | 95% CI    | p    |
| <b>Parental death</b>  |                      |           |      |                                     |           |      |                     |           |      |                     |           |      |                      |           |      |                       |           |      |
| No death age 0-20      | Ref                  |           |      |                                     |           |      |                     |           |      |                     |           |      |                      |           |      |                       |           |      |
| Father dies age 0-20   | 1.44                 | 1.13-1.85 | .004 | 1.47                                | 1.14-1.88 | .002 |                     |           |      |                     |           |      |                      |           |      |                       |           |      |
| Mother dies age 0-20   | 1.88                 | 1.50-2.35 | .000 | 1.93                                | 1.54-2.41 | .000 |                     |           |      |                     |           |      |                      |           |      |                       |           |      |
| No death between 0-1   |                      |           |      |                                     |           |      |                     |           |      | Ref                 |           |      | Ref                  |           |      | Ref                   |           |      |
| Father 0-1             |                      |           |      |                                     |           |      | 2.13                | 1.06-4.28 | .034 | 0.63                | 0.20-1.95 | .421 | 0.78                 | 0.11-5.57 | .802 | 1.95                  | 0.48-2.50 | .353 |
| Mother 0-1             |                      |           |      |                                     |           |      | 5.48                | 3.86-7.80 | .000 | 1.93                | 0.91-4.08 | .085 | 0.00                 | -         | .975 | 0.00                  | -         | .977 |
| No death between 1-5   |                      |           |      |                                     |           |      | -                   |           |      | Ref                 |           |      | Ref                  |           |      | Ref                   |           |      |
| Father 1-5             |                      |           |      |                                     |           |      | -                   |           |      | 1.67                | 0.94-2.97 | .081 | 1.30                 | 0.64-2.66 | .466 | 0.76                  | 0.42-2.52 | .957 |
| Mother 1-5             |                      |           |      |                                     |           |      | -                   |           |      | 2.25                | 1.34-3.78 | .002 | 1.62                 | 0.85-3.07 | .140 | 1.03                  | 0.28-2.07 | .597 |
| No death between 5-12  |                      |           |      |                                     |           |      | -                   |           |      | -                   |           |      | Ref                  |           |      | Ref                   |           |      |
| Father 5-12            |                      |           |      |                                     |           |      | -                   |           |      | -                   |           |      | 1.75                 | 0.81-3.76 | .153 | 1.67                  | 0.97-2.86 | .064 |
| Mother 5-12            |                      |           |      |                                     |           |      | -                   |           |      | -                   |           |      | 0.47                 | 0.12-1.91 | .293 | 1.17                  | 0.63-2.16 | .625 |
| No death between 12-20 |                      |           |      |                                     |           |      |                     |           |      |                     |           |      |                      |           |      | Ref                   |           |      |
| Father 12-20           |                      |           |      |                                     |           |      |                     |           |      |                     |           |      |                      |           |      | 1.73                  | 0.93-3.25 | .085 |
| Mother 12-20           |                      |           |      |                                     |           |      |                     |           |      |                     |           |      |                      |           |      | 1.09                  | 0.48-2.50 | .831 |
| <b>Events</b>          | 2,403                |           |      | 2,403                               |           |      | 1,394               |           |      | 664                 |           |      | 190                  |           |      | 155                   |           |      |
| <b>Observations</b>    | 6,107                |           |      | 6,107                               |           |      | 6,107               |           |      | 4,713               |           |      | 4,049                |           |      | 3,859                 |           |      |

Notes: Father/Mother death within age group under analysis are marked in grey; lagged effects are shown above the diagonal (e.g. effect of parental death between age 0-1 in on death child between age 1-5). Effects are hazard rates from proportional hazard Cox models. Models 2-6 control for the effects of socioeconomic status, region, period and death of the other parent as well as death of the parent in an earlier period (see Table 1).

Table S3. Effect of parental death in period in childhood on boys' likelihood of death, Cox proportional hazard survival analysis, birth cohort 1880-1899

|                        | Model 1: Age 0 to 20 |           |      | Model 2: Age 0 to 20, controlled |           |      | Model 3: Age 0 to 1 |           |      | Model 4: Age 1 to 5 |           |      | Model 5: Age 5 to 12 |           |      | Model 6: Age 12 to 20 |            |      |
|------------------------|----------------------|-----------|------|----------------------------------|-----------|------|---------------------|-----------|------|---------------------|-----------|------|----------------------|-----------|------|-----------------------|------------|------|
|                        | HR                   | 95% CI    | p    | HR                               | 95% CI    | p    | HR                  | 95% CI    | p    | HR                  | 95% CI    | p    | HR                   | 95% CI    | p    | HR                    | 95% CI     | p    |
| <b>Parental death</b>  |                      |           |      |                                  |           |      |                     |           |      |                     |           |      |                      |           |      |                       |            |      |
| No death age 0-20      | Ref                  |           |      |                                  |           |      |                     |           |      |                     |           |      |                      |           |      |                       |            |      |
| Father dies age 0-20   | 1.71                 | 1.26-2.31 | .001 | 1.73                             | 1.27-2.34 | .000 |                     |           |      |                     |           |      |                      |           |      |                       |            |      |
| Mother dies age 0-20   | 1.94                 | 1.47-2.55 | .000 | 1.95                             | 1.48-2.56 | .000 |                     |           |      |                     |           |      |                      |           |      |                       |            |      |
| No death between 0-1   |                      |           |      |                                  |           |      | Ref                 |           |      | Ref                 |           |      | Ref                  |           |      | Ref                   |            |      |
| Father 0-1             |                      |           |      |                                  |           |      | 3.41                | 1.52-7.62 | .003 | 2.23                | 0.83-6.00 | .111 | 0.00                 | -         | .989 | 2.26                  | 0.31-16.31 | .420 |
| Mother 0-1             |                      |           |      |                                  |           |      | 3.28                | 1.97-5.45 | .000 | 1.34                | 0.43-4.18 | .617 | 0.00                 | -         | .988 | 0.00                  |            | .981 |
| No death between 1-5   |                      |           |      |                                  |           |      | -                   |           |      | Ref                 |           |      | Ref                  |           |      | Ref                   |            |      |
| Father 1-5             |                      |           |      |                                  |           |      | -                   |           |      | 1.68                | 0.75-3.79 | .208 | 1.22                 | 0.45-3.31 | .697 | 0.72                  | 0.18-2.91  | .641 |
| Mother 1-5             |                      |           |      |                                  |           |      | -                   |           |      | 2.13                | 1.00-4.53 | .049 | 2.12                 | 0.99-4.56 | .054 | 1.41                  | 0.52-3.84  | .501 |
| No death between 5-12  |                      |           |      |                                  |           |      | -                   |           |      | -                   |           |      | Ref                  |           |      | Ref                   |            |      |
| Father 5-12            |                      |           |      |                                  |           |      | -                   |           |      | -                   |           |      | 1.75                 | 0.97-5.12 | .058 | 1.53                  | 1.07-3.55  | .030 |
| Mother 5-12            |                      |           |      |                                  |           |      | -                   |           |      | -                   |           |      | 1.88                 | 0.76-4.64 | .172 | 1.95                  | 0.77-3.03  | .224 |
| No death between 12-20 |                      |           |      |                                  |           |      |                     |           |      |                     |           |      |                      |           |      | Ref                   |            |      |
| Father 12-20           |                      |           |      |                                  |           |      |                     |           |      |                     |           |      |                      |           |      | 1.21                  | 0.53-2.77  | .657 |
| Mother 12-20           |                      |           |      |                                  |           |      |                     |           |      |                     |           |      |                      |           |      | 1.76                  | 0.81-3.80  | .152 |
| <b>Events</b>          | 2,048                |           |      | 2,048                            |           |      | 1,288               |           |      | 491                 |           |      | 142                  |           |      | 127                   |            |      |
| <b>Observations</b>    | 6,842                |           |      | 6,842                            |           |      | 6,842               |           |      | 5,554               |           |      | 5,063                |           |      | 4,921                 |            |      |

Notes: Father/Mother death within age group under analysis are marked in grey; lagged effects are shown above the diagonal (e.g. effect of parental death between age 0-1 in on death child between age 1-5). Effects are hazard rates from proportional hazard Cox models. Models 2-6 control for the effects of socioeconomic status, region, period and death of the other parent as well as death of the parent in an earlier period (see Table 1).

Table S4. Effect of parental death in period in childhood on boys' likelihood of death, Cox proportional hazard survival analysis, birth cohort 1900-1922

|                        | Model 1: Age 0 to 20 |           |      | Model 2: Age 0 to 20, controlled |           |      | Model 3: Age 0 to 1 |           |      | Model 4: Age 1 to 5 |           |      | Model 5: Age 5 to 12 |           |      | Model 6: Age 12 to 20 |           |      |
|------------------------|----------------------|-----------|------|----------------------------------|-----------|------|---------------------|-----------|------|---------------------|-----------|------|----------------------|-----------|------|-----------------------|-----------|------|
|                        | HR                   | 95% CI    | p    | HR                               | 95% CI    | p    | HR                  | 95% CI    | p    | HR                  | 95% CI    | p    | HR                   | 95% CI    | p    | HR                    | 95% CI    | p    |
| <b>Parental death</b>  |                      |           |      |                                  |           |      |                     |           |      |                     |           |      |                      |           |      |                       |           |      |
| No death age 0-20      | Ref                  |           |      |                                  |           |      |                     |           |      |                     |           |      |                      |           |      |                       |           |      |
| Father dies age 0-20   | 1.14                 | 0.63-2.00 | .642 | 1.12                             | 0.64-1.96 | .692 |                     |           |      |                     |           |      |                      |           |      |                       |           |      |
| Mother dies age 0-20   | 1.08                 | 0.63-1.86 | .770 | 1.06                             | 0.62-1.81 | .839 |                     |           |      |                     |           |      |                      |           |      |                       |           |      |
| No death between 0-1   |                      |           |      |                                  |           |      | Ref                 |           |      | Ref                 |           |      | Ref                  |           |      | Ref                   |           |      |
| Father 0-1             |                      |           |      |                                  |           |      | 2.18                | 0.54-8.76 | .273 | 1.18                | 0.11-5.97 | .868 | 0.00                 | -         | .995 | 0.00                  | -         | .208 |
| Mother 0-1             |                      |           |      |                                  |           |      | 3.20                | 1.32-7.73 | .015 | 0.82                | 0.16-8.58 | .848 | 0.00                 | -         | .995 | 3.58                  | -         | .991 |
| No death between 1-5   |                      |           |      |                                  |           |      | -                   |           |      | Ref                 |           |      | Ref                  |           |      | Ref                   |           |      |
| Father 1-5             |                      |           |      |                                  |           |      | -                   |           |      | 1.37                | 0.34-5.56 | .656 | 0.00                 | -         | .988 | 0.73                  | -         | .755 |
| Mother 1-5             |                      |           |      |                                  |           |      | -                   |           |      | 0.00                | -         | .989 | 1.71                 | 0.42-7.00 | .456 | 0.00                  | -         | .982 |
| No death between 5-12  |                      |           |      |                                  |           |      | -                   |           |      | -                   |           |      | Ref                  |           |      | Ref                   |           |      |
| Father 5-12            |                      |           |      |                                  |           |      | -                   |           |      | -                   |           |      | 1.75                 | 0.16-8.62 | .866 | 1.33                  | 1.07-3.55 | .631 |
| Mother 5-12            |                      |           |      |                                  |           |      | -                   |           |      | -                   |           |      | 1.88                 | 0.82-8.50 | .105 | 0.35                  | 0.77-3.03 | .300 |
| No death between 12-20 |                      |           |      |                                  |           |      |                     |           |      |                     |           |      |                      |           |      | Ref                   |           |      |
| Father 12-20           |                      |           |      |                                  |           |      |                     |           |      |                     |           |      |                      |           |      | 0.53                  | 0.53-2.77 | .525 |
| Mother 12-20           |                      |           |      |                                  |           |      |                     |           |      |                     |           |      |                      |           |      | 1.82                  | 0.81-3.80 | .316 |
| <b>Events</b>          | 1,059                |           |      | 1,059                            |           |      | 653                 |           |      | 255                 |           |      | 77                   |           |      | 74                    |           |      |
| <b>Observations</b>    | 5,896                |           |      | 5,896                            |           |      | 5,896               |           |      | 5,243               |           |      | 4,988                |           |      | 4,911                 |           |      |

Notes: Father/Mother death within age group under analysis are marked in grey; lagged effects are shown above the diagonal (e.g. effect of parental death between age 0-1 in on death child between age 1-5). Effects are hazard rates from proportional hazard Cox models. Models 2-6 control for the effects of socioeconomic status, region, period and death of the other parent as well as death of the parent in an earlier period (see Table 1).

Table S5. Effect of parental death in period in childhood on girls' likelihood of death, Cox proportional hazard survival analysis, birth cohort 1850-1879

|                        | Model 1: Age 0 to 20 |           |      | Model 2: Age 0 to 20,<br>controlled |           |      | Model 3: Age 0 to 1 |           |      | Model 4: Age 1 to 5 |           |      | Model 5: Age 5 to 12 |           |      | Model 6: Age 12 to 20 |           |      |
|------------------------|----------------------|-----------|------|-------------------------------------|-----------|------|---------------------|-----------|------|---------------------|-----------|------|----------------------|-----------|------|-----------------------|-----------|------|
|                        | HR                   | 95% CI    | p    | HR                                  | 95% CI    | p    | HR                  | 95% CI    | p    | HR                  | 95% CI    | p    | HR                   | 95% CI    | p    | HR                    | 95% CI    | p    |
| <b>Parental death</b>  |                      |           |      |                                     |           |      |                     |           |      |                     |           |      |                      |           |      |                       |           |      |
| No death age 0-20      | Ref                  |           |      |                                     |           |      |                     |           |      |                     |           |      |                      |           |      |                       |           |      |
| Father dies age 0-20   | 1.67                 | 1.28-2.18 | .000 | 1.72                                | 1.32-2.24 | .000 |                     |           |      |                     |           |      |                      |           |      |                       |           |      |
| Mother dies age 0-20   | 2.11                 | 1.66-2.67 | .000 | 2.19                                | 1.72-2.78 | .000 |                     |           |      |                     |           |      |                      |           |      |                       |           |      |
| No death between 0-1   |                      |           |      |                                     |           |      | Ref                 |           |      | Ref                 |           |      | Ref                  |           |      | Ref                   |           |      |
| Father 0-1             |                      |           |      |                                     |           |      | 1.99                | 0.25-4.09 | .979 | 2.01                | 1.04-3.90 | .039 | 0.954                | 0.13-6.86 | .963 | 2.37                  | 0.58-9.71 | .231 |
| Mother 0-1             |                      |           |      |                                     |           |      | 4.89                | 3.61-8.78 | .000 | 1.88                | 0.84-4.21 | .126 | 0.00                 | -         | .977 | 1.20                  | 0.13-8.63 | .855 |
| No death between 1-5   |                      |           |      |                                     |           |      | -                   |           |      | Ref                 |           |      | Ref                  |           |      | Ref                   |           |      |
| Father 1-5             |                      |           |      |                                     |           |      | -                   |           |      | 0.71                | 0.25-1.90 | .491 | 1.47                 | 0.95-3.65 | .072 | 1.70                  | 0.75-3.89 | .206 |
| Mother 1-5             |                      |           |      |                                     |           |      | -                   |           |      | 2.89                | 1.72-4.85 | .000 | 2.17                 | 1.24-4.22 | .008 | 1.07                  | 0.40-2.91 | .891 |
| No death between 5-12  |                      |           |      |                                     |           |      | -                   |           |      | -                   |           |      | Ref                  |           |      | Ref                   |           |      |
| Father 5-12            |                      |           |      |                                     |           |      | -                   |           |      | -                   |           |      | 2.32                 | 1.22-4.44 | .011 | 1.80                  | 1.05-3.08 | .033 |
| Mother 5-12            |                      |           |      |                                     |           |      | -                   |           |      | -                   |           |      | 1.34                 | 0.55-3.28 | .522 | 1.18                  | 0.62-2.25 | .612 |
| No death between 12-20 |                      |           |      |                                     |           |      |                     |           |      |                     |           |      |                      |           |      | Ref                   |           |      |
| Father 12-20           |                      |           |      |                                     |           |      |                     |           |      |                     |           |      |                      |           |      | 2.16                  | 1.12-4.15 | .022 |
| Mother 12-20           |                      |           |      |                                     |           |      |                     |           |      |                     |           |      |                      |           |      | 0.96                  | 0.35-2.61 | .941 |
| <b>Events</b>          | 2,075                |           |      | 2,075                               |           |      | 1,113               |           |      | 612                 |           |      | 195                  |           |      | 155                   |           |      |
| <b>Observations</b>    | 5,730                |           |      | 5,730                               |           |      | 5,730               |           |      | 4,617               |           |      | 4,005                |           |      | 3,810                 |           |      |

*Notes: Father or mother death within age group under analysis are marked in grey; lagged effects are shown above the diagonal (e.g. effect of parental death between ages 0-1 on mortality between ages 1-5). Effects are hazard rates from proportional hazard Cox models. Models 2-6 control for the effects of birth order, socioeconomic status, region, and death of the other parent as well as death of the parent in an earlier period (see Table 1).*

Table S6. Effect of parental death in period in childhood on girls' likelihood of death, Cox proportional hazard survival analysis, birth cohort 1880-1899

|                        | Model 1: Age 0 to 20 |           |      | Model 2: Age 0 to 20,<br>controlled |           |      | Model 3: Age 0 to 1 |           |      | Model 4: Age 1 to 5 |           |      | Model 5: Age 5 to 12 |            |      | Model 6: Age 12 to 20 |            |      |
|------------------------|----------------------|-----------|------|-------------------------------------|-----------|------|---------------------|-----------|------|---------------------|-----------|------|----------------------|------------|------|-----------------------|------------|------|
|                        | HR                   | 95% CI    | p    | HR                                  | 95% CI    | p    | HR                  | 95% CI    | p    | HR                  | 95% CI    | p    | HR                   | 95% CI     | p    | HR                    | 95% CI     | p    |
| <b>Parental death</b>  |                      |           |      |                                     |           |      |                     |           |      |                     |           |      |                      |            |      |                       |            |      |
| No death age 0-20      | Ref                  |           |      |                                     |           |      |                     |           |      |                     |           |      |                      |            |      |                       |            |      |
| Father dies age 0-20   | 1.77                 | 1.04-2.08 | .030 | 1.50                                | 1.06-2.13 | .022 |                     |           |      |                     |           |      |                      |            |      |                       |            |      |
| Mother dies age 0-20   | 2.54                 | 1.98-3.26 | .000 | 2.55                                | 1.99-3.28 | .000 |                     |           |      |                     |           |      |                      |            |      |                       |            |      |
| No death between 0-1   |                      |           |      |                                     |           |      | Ref                 |           |      | Ref                 |           |      | Ref                  |            |      | Ref                   |            |      |
| Father 0-1             |                      |           |      |                                     |           |      | 2.97                | 1.11-7.95 | .030 | 2.42                | 1.08-5.44 | .032 | 1.28                 | 0.18-9.23  | .804 | 0.00                  | -          | .983 |
| Mother 0-1             |                      |           |      |                                     |           |      | 4.42                | 2.60-7.51 | .000 | 1.43                | 0.46-4.45 | .538 | 1.60                 | 0.22-11.49 | .640 | 2.01                  | 0.28-14.46 | .490 |
| No death between 1-5   |                      |           |      |                                     |           |      | -                   |           |      | Ref                 |           |      | Ref                  |            |      | Ref                   |            |      |
| Father 1-5             |                      |           |      |                                     |           |      | -                   |           |      | 1.75                | 0.78-3.92 | .177 | 0.83                 | 0.26-2.61  | .750 | 0.74                  | 0.18-3.01  | .677 |
| Mother 1-5             |                      |           |      |                                     |           |      | -                   |           |      | 2.52                | 1.34-4.75 | .004 | 2.33                 | 1.19-4.60  | .014 | 0.61                  | 0.15-2.47  | .488 |
| No death between 5-12  |                      |           |      |                                     |           |      | -                   |           |      | -                   |           |      | Ref                  |            |      | Ref                   |            |      |
| Father 5-12            |                      |           |      |                                     |           |      | -                   |           |      | -                   |           |      | 0.83                 | 0.20-3.40  | .800 | 1.64                  | 0.83-3.25  | .156 |
| Mother 5-12            |                      |           |      |                                     |           |      | -                   |           |      | -                   |           |      | 2.65                 | 1.23-5.73  | .013 | 1.51                  | 0.73-3.10  | .264 |
| No death between 12-20 |                      |           |      |                                     |           |      |                     |           |      |                     |           |      |                      |            |      | Ref                   |            |      |
| Father 12-20           |                      |           |      |                                     |           |      |                     |           |      |                     |           |      |                      |            |      | 1.54                  | 0.71-3.34  | .277 |
| Mother 12-20           |                      |           |      |                                     |           |      |                     |           |      |                     |           |      |                      |            |      | 3.07                  | 1.58-5.69  | .001 |
| Events                 | 1,813                |           |      | 1,813                               |           |      | 1,018               |           |      | 518                 |           |      | 152                  |            |      | 125                   |            |      |
| Observations           | 6,578                |           |      | 6,578                               |           |      | 6,578               |           |      | 5,560               |           |      | 5,042                |            |      | 4,890                 |            |      |

Notes: Father or mother death within age group under analysis are marked in grey; lagged effects are shown above the diagonal (e.g. effect of parental death between ages 0-1 on mortality between ages 1-5). Effects are hazard rates from proportional hazard Cox models. Models 2-6 control for the effects of birth order, socioeconomic status, region, period and death of the other parent as well as death of the parent in an earlier period (see Table 1).



Table S7. Effect of parental death in period in childhood on girls' likelihood of death, Cox proportional hazard survival analysis, birth cohort 1900-1922

|                        | Model 1: Age 0 to 20 |           |      | Model 2: Age 0 to 20,<br>controlled |           |      | Model 3: Age 0 to 1 |            |      | Model 4: Age 1 to 5 |            |      | Model 5: Age 5 to 12 |           |      | Model 6: Age 12 to 20 |           |       |
|------------------------|----------------------|-----------|------|-------------------------------------|-----------|------|---------------------|------------|------|---------------------|------------|------|----------------------|-----------|------|-----------------------|-----------|-------|
|                        | HR                   | 95% CI    | p    | HR                                  | 95% CI    | p    | HR                  | 95% CI     | p    | HR                  | 95% CI     | p    | HR                   | 95% CI    | p    | HR                    | 95% CI    | p     |
| <b>Parental death</b>  |                      |           |      |                                     |           |      |                     |            |      |                     |            |      |                      |           |      |                       |           |       |
| No death age 0-20      | Ref                  |           |      |                                     |           |      |                     |            |      |                     |            |      |                      |           |      |                       |           |       |
| Father dies age 0-20   | 2.13                 | 1.32-3.43 | .002 | 2.02                                | 1.25-3.25 | .004 |                     |            |      |                     |            |      |                      |           |      |                       |           |       |
| Mother dies age 0-20   | 1.59                 | 0.95-2.64 | .076 | 1.56                                | 0.93-2.59 | .089 |                     |            |      |                     |            |      |                      |           |      |                       |           |       |
| No death between 0-1   |                      |           |      |                                     |           |      | Ref                 |            |      | Ref                 |            |      | Ref                  |           |      | Ref                   |           |       |
| Father 0-1             |                      |           |      |                                     |           |      | 5.01                | 1.25-20.15 | .023 | 1.94                | 0.22-11.11 | .509 | 0.00                 | -         |      | 0.00                  | -         |       |
| Mother 0-1             |                      |           |      |                                     |           |      | 3.93                | 1.46-10.58 | .007 | 1.55                | 0.27-13.90 | .664 | 0.00                 | -         |      | 0.00                  | -         |       |
| No death between 1-5   |                      |           |      |                                     |           |      | -                   |            |      | Ref                 |            |      | Ref                  |           |      | Ref                   |           |       |
| Father 1-5             |                      |           |      |                                     |           |      | -                   |            |      | 1.71                | 0.42-6.95  | .451 | 1.72                 | 0.42-7.10 | .450 | 2.40                  | 0.75-7.71 | 0.142 |
| Mother 1-5             |                      |           |      |                                     |           |      | -                   |            |      | 2.03                | 0.50-8.24  | .320 | 0.98                 | 0.13-7.07 | .981 | 0.00                  | -         |       |
| No death between 5-12  |                      |           |      |                                     |           |      | -                   |            |      | -                   |            |      | Ref                  |           |      | Ref                   |           |       |
| Father 5-12            |                      |           |      |                                     |           |      | -                   |            |      | -                   |            |      | 2.05                 | 0.49-8.42 | .327 | 1.25                  | 0.39-4.00 | .705  |
| Mother 5-12            |                      |           |      |                                     |           |      | -                   |            |      | -                   |            |      | 1.73                 | 0.42-7.17 | .447 | 2.31                  | 0.99-5.36 | .052  |
| No death between 12-20 |                      |           |      |                                     |           |      |                     |            |      |                     |            |      |                      |           |      | Ref                   |           |       |
| Father 12-20           |                      |           |      |                                     |           |      |                     |            |      |                     |            |      |                      |           |      | 2.15                  | 0.78-5.94 | .141  |
| Mother 12-20           |                      |           |      |                                     |           |      |                     |            |      |                     |            |      |                      |           |      | 1.08                  | 0.26-4.47 | .915  |
| <b>Events</b>          | 884                  |           |      | 884                                 |           |      | 526                 |            |      | 217                 |            |      | 65                   |           |      | 76                    |           |       |
| <b>Observations</b>    | 5,558                |           |      | 5,558                               |           |      | 5,558               |            |      | 5,032               |            |      | 4,815                |           |      | 4,750                 |           |       |

*Notes: Father or mother death within age group under analysis are marked in grey; lagged effects are shown above the diagonal (e.g. effect of parental death between ages 0-1 on mortality between ages 1-5). Effects are hazard rates from proportional hazard Cox models. Models 2-6 control for the effects of birth order, socioeconomic status, region, period and death of the other parent as well as death of the parent in an earlier period (see Table 1).*

Table S8: Effect of paternal and maternal death and birth order on boys' likelihood of death, interaction models, Cox proportional hazard survival analysis

|                              | <i>Interaction with birth order linearly</i> |         | <i>Interaction with birth order categorically</i> |         |
|------------------------------|----------------------------------------------|---------|---------------------------------------------------|---------|
| <b>Parental death</b>        | Hazard ratio                                 | P value | Hazard ratio                                      | P value |
| Both parents survive         | Ref.                                         |         | Ref.                                              |         |
| Paternal death               | 2.618                                        | .000    | 2.371                                             |         |
| Maternal death               | 1.827                                        | .000    | 1.618                                             |         |
| Birth order * Paternal death | .861                                         | .000    |                                                   |         |
| Birth order * Maternal death | .997                                         | .921    |                                                   |         |
| Birth order * Paternal death |                                              |         |                                                   |         |
| Second son                   |                                              |         | 1.417                                             | 0.021   |
| Third son                    |                                              |         | 0.938                                             | 0.002   |
| Fourth son                   |                                              |         | 1.598                                             | 0.002   |
| Fifth son                    |                                              |         | 0.742                                             | 0.070   |
| Birth order * Maternal death |                                              |         |                                                   |         |
| Second son                   |                                              |         | 0.593                                             | 0.086   |
| Third son                    |                                              |         | 0.450                                             | 0.796   |
| Fourth son                   |                                              |         | 0.363                                             | 0.085   |
| Fifth son                    |                                              |         | 0.531                                             | 0.364   |
| <b>Events</b>                | 5,510                                        |         | 5,510                                             |         |
| <b>Observations</b>          | 18,814                                       |         | 18,814                                            |         |

Notes: Signif. codes: 0 '\*\*\*' 0.001 '\*\*' 0.01 '\*' 0.05 '.' 0.1. All models are controlled for a time trend (secular trend in heights).

Table S9. Effect of parental death in childhood on height outcomes of boys in centimeters, by birth cohort, OLS regression model

|                               | <i>Obs.</i> | <i>1850-1879</i> | <i>1880-1899</i> | <i>1900-1922</i> | <i>Full model</i> |
|-------------------------------|-------------|------------------|------------------|------------------|-------------------|
| No death in age interval      | 3041        | Ref.             | Ref.             | Ref.             | Ref.              |
| Paternal death                | 537         | 0.84 ‘           | -0.29            | 1.62 ‘           | 0.81 ‘            |
| Maternal death                | 487         | -1.16 *          | -0.65            | -0.61            | -1.19 *           |
| Both died                     | 101         | -0.73            | -1.22            | 0.03             | -0.77             |
| Paternal death * 1880-1899    |             |                  |                  |                  | -1.10             |
| Paternal death * 1900-1922    |             |                  |                  |                  | 0.67              |
| Maternal death * 1880-1899    |             |                  |                  |                  | 0.52              |
| Maternal death * 1900-1922    |             |                  |                  |                  | 0.60              |
| Both died * 1880-1899         |             |                  |                  |                  | -0.52             |
| Both died * 1900-1922         |             |                  |                  |                  | 1.03              |
| <b>Intercept</b>              |             | 166.8            | 169.8            | 172.7            | 167.0             |
| <b>Adjusted R<sup>2</sup></b> |             | 0.02             | 0.02             | 0.03             | 0.106             |
| <b>Observations</b>           |             | 1,843            | 1,655            | 668              | 4,166             |

*Signif. codes: 0 ‘\*\*\*’ 0.001 ‘\*\*’ 0.01 ‘\*’ 0.05 ‘.’ 0.1, The models control for the effects of socioeconomic status and region.*

Table S10: Effect of parental death in period in childhood on height outcomes of boys in centimeters, per birth cohort, by age, OLS regression model

|                                         | Obs. | 1850-1879 | 1880-1899 | 1900-1922 | Full model |
|-----------------------------------------|------|-----------|-----------|-----------|------------|
| <b>Parental death (timing)</b>          |      |           |           |           |            |
| No death                                | 3041 | Ref.      | Ref.      | Ref.      | Ref.       |
| Paternal death between 0-1              | 21   | -3.09     | -3.02     | 1.46      | -3.08      |
| Paternal death between 1-5              | 87   | 1.27      | -0.66     | 3.49      | 1.29       |
| Paternal death between 5-12             | 192  | 1.28 ‘    | 0.45      | 2.85 ‘    | 1.23 ‘     |
| Paternal death between 12-20            | 237  | 0.61      | -0.51     | 0.13      | 0.57       |
| Maternal death between 0-1              | 14   | -1.95     | -0.85     | -0.61     | -1.95      |
| Maternal death between 1-5              | 113  | 0.48      | -2.71 **  | -0.17     | -0.31      |
| Maternal death between 5-12             | 158  | -2.14 **  | -0.85     | -3.61 *   | -2.19 **   |
| Maternal death between 12-20            | 202  | -1.04     | 0.54      | 1.31      | -0.31      |
| Both died                               | 101  | -0.73     | -1.21     | 0.96      | -0.78      |
| Paternal death between 0-1 *1880-1899   |      |           |           |           | 0.05       |
| Paternal death between 1-5 *1880-1899   |      |           |           |           | -1.96      |
| Paternal death between 5-12 *1880-1899  |      |           |           |           | -0.82      |
| Paternal death between 12-20 *1880-1899 |      |           |           |           | -1.04      |
| Paternal death between 0-1 *1900-1922   |      |           |           |           | 3.98       |
| Paternal death between 1-5 *1900-1922   |      |           |           |           | 1.86       |
| Paternal death between 5-12 *1900-1922  |      |           |           |           | 1.35       |
| Paternal death between 12-20 *1900-1922 |      |           |           |           | -0.36      |
| Maternal death between 0-1 *1880-1899   |      |           |           |           | 0.91       |
| Maternal death between 1-5 *1880-1899   |      |           |           |           | -2.67 ‘    |
| Maternal death between 5-12 *1880-1899  |      |           |           |           | 1.32       |
| Maternal death between 12-20 *1880-1899 |      |           |           |           | 1.51       |
| Maternal death between 0-1 *1900-1922   |      |           |           |           | 1.89       |
| Maternal death between 1-5 *1900-1922   |      |           |           |           | -0.27      |
| Maternal death between 5-12 *1900-1922  |      |           |           |           | -1.50      |
| Maternal death between 12-20 *1900-1922 |      |           |           |           | 2.44       |
| Both died *1880-1899                    |      |           |           |           | -0.52      |
| Both died *1900-1922                    |      |           |           |           | 1.04       |
| <b>Intercept</b>                        |      | 166.8     | 169.8     | 172.6     | 167.0      |
| <b>Adjusted R<sup>2</sup></b>           |      | 0.02      | 0.02      | 0.03      | 0.107      |
| <b>Observations</b>                     |      | 1,843     | 1,655     | 668       | 4,166      |

Signif. codes: 0 \*\*\* 0.001 \*\* 0.01 \* 0.05 ‘ 0.1, The models control for the effects of socioeconomic status and region
